# Supplementary figures and images for: Novel Interactions of Myristic Acid and FADS3 Variants Predict Atopic Dermatitis among Indonesian Infants
Source: MDPI journal article supplement (doi:10.3390/nu14214676), 2022-11-04

Plasma (P-0y)

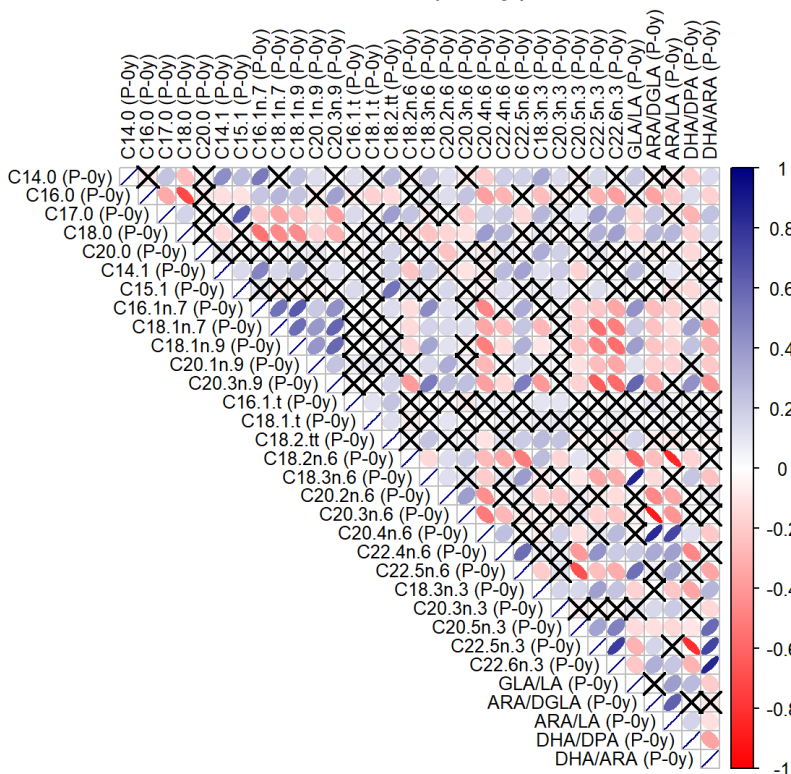

Buccal (B-0y)

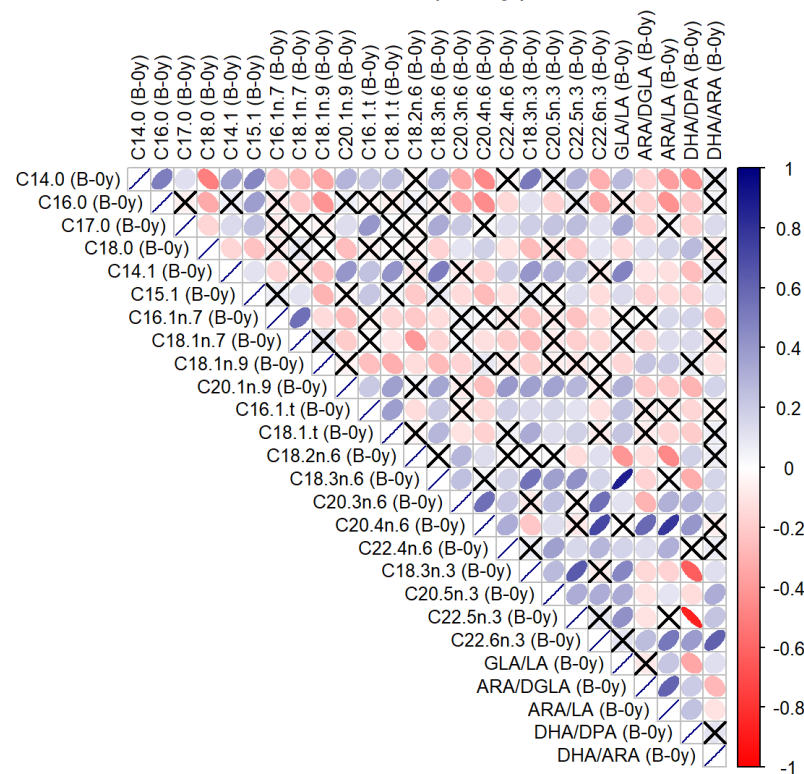

Buccal (B-1y)

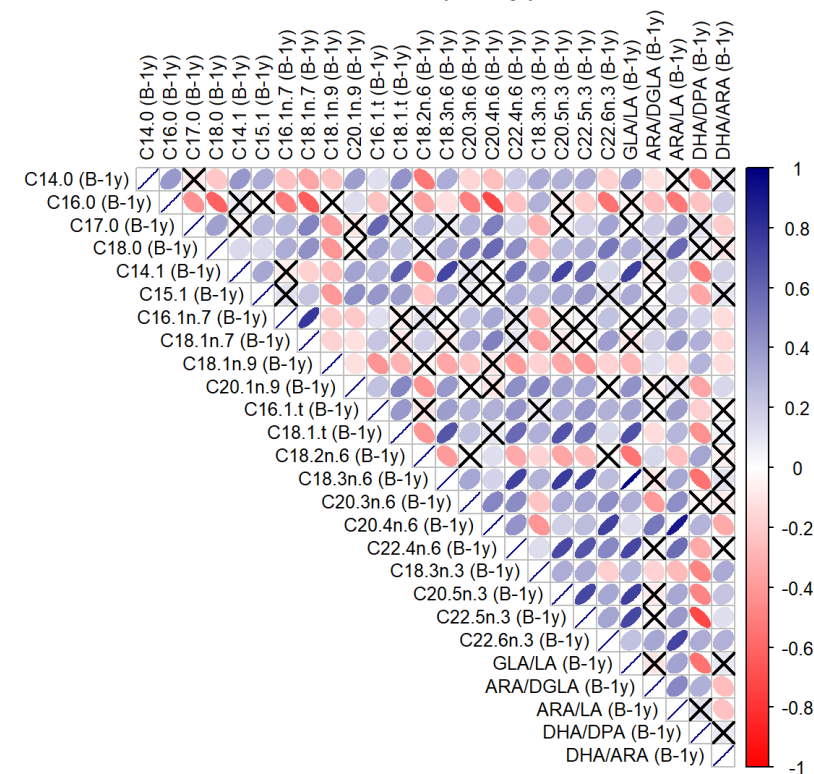

Supplement: s1 [file s1]
